# Supplementary material for: P2X7 Receptor Augments LPS-Induced Nitrosative Stress by Regulating Nrf2 and GSH Levels in the Mouse Hippocampus
Source: MDPI journal article supplement (doi:10.3390/antiox11040778), 2022-04-13
Supplement: s1 [file s1]

## **Supplementary Information**

# **P2X7 Receptor Augments LPS-Induced Nitrosative Stress by Regulating Nrf2 and GSH Levels in the Mouse Hippocampus**

Duk-Shin Lee<sup>1</sup> and Ji-Eun Kim<sup>1,\*</sup>

<sup>1</sup>Department of Anatomy and Neurobiology, Institute of Epilepsy Research, College of Medicine, Hallym University, Chuncheon 24252, South Korea

Running title: Role of P2X7R in LPS-induced nitrosative stress

\* Correspondence to: J.-E Kim, Department of Anatomy and Neurobiology, College of Medicine, Hallym University, Chuncheon, Kangwon-Do 24252, South Korea; Tel: +82-33-248-2522; Fax: +82-33-248-2525;  
E-mail: jieunkim@hallym.ac.kr

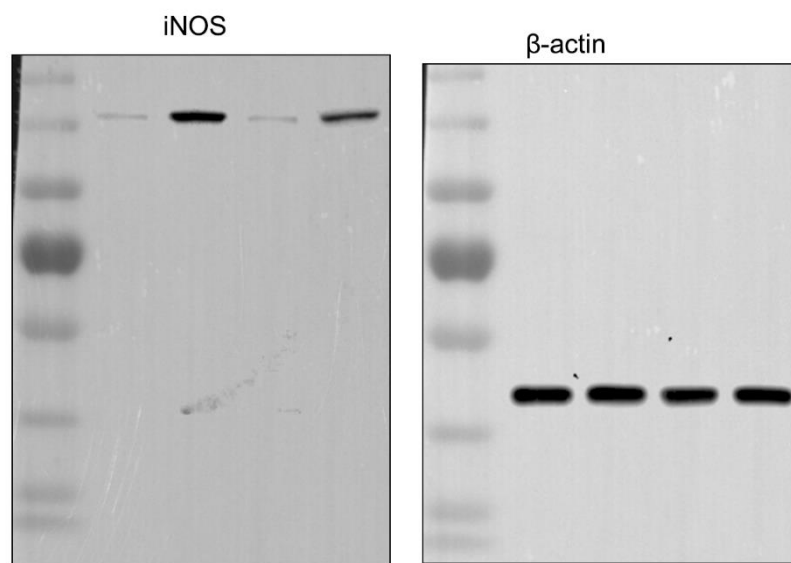

**Supplementary Figure S1.** Full-length gel images of Western blot data in Figure 2A.

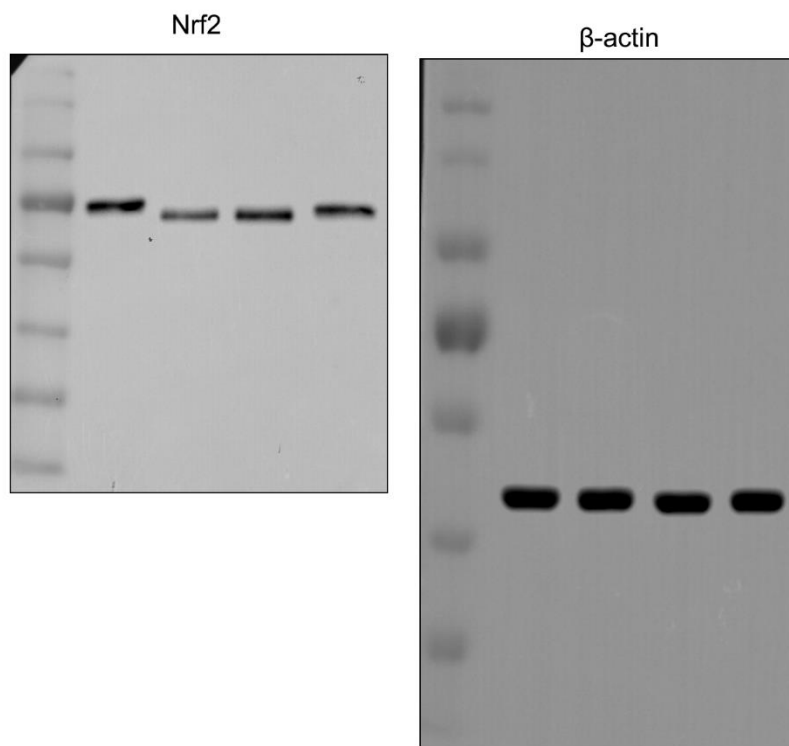

**Supplementary Figure S2.** Full-length gel images of Western blot data in Figure 4A.

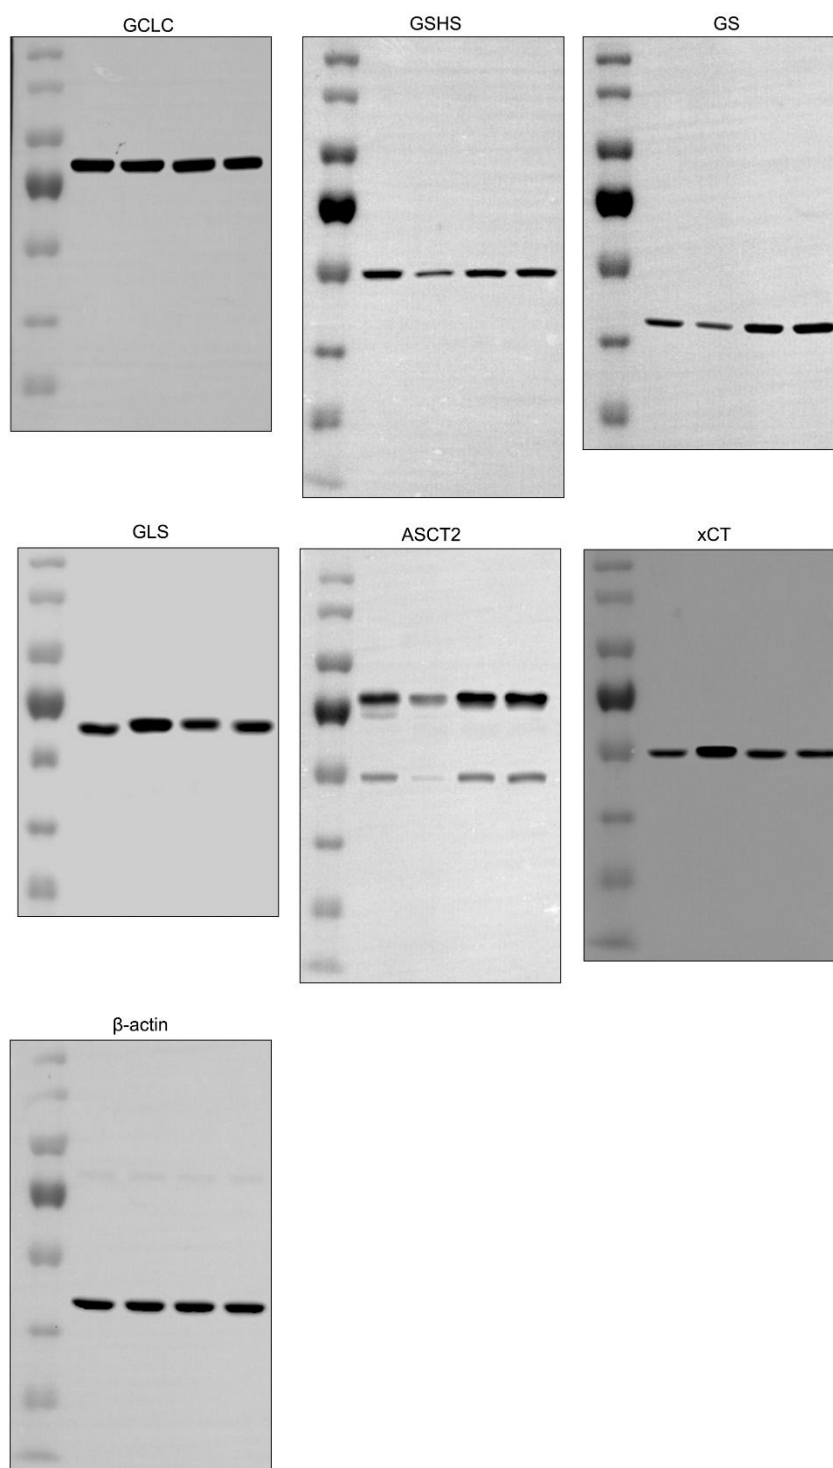

**Supplementary Figure S3.** Full-length gel images of Western blot data in Figure 6B.

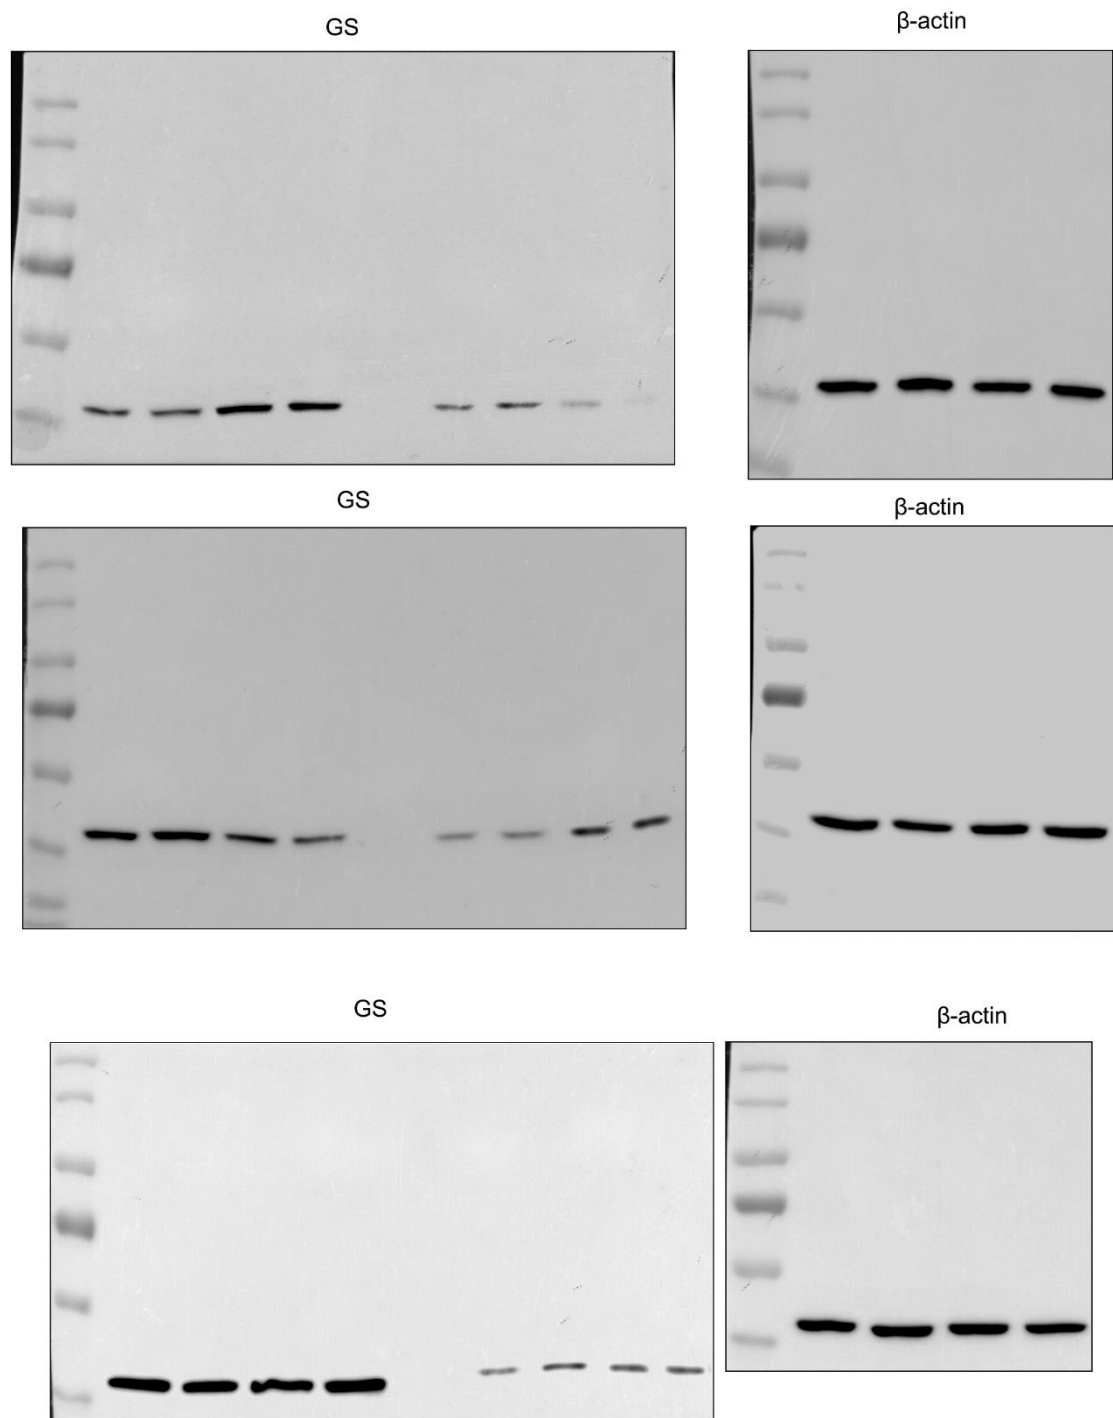

**Supplementary Figure S4.** Full-length gel images of Western blot data in Figure 7.

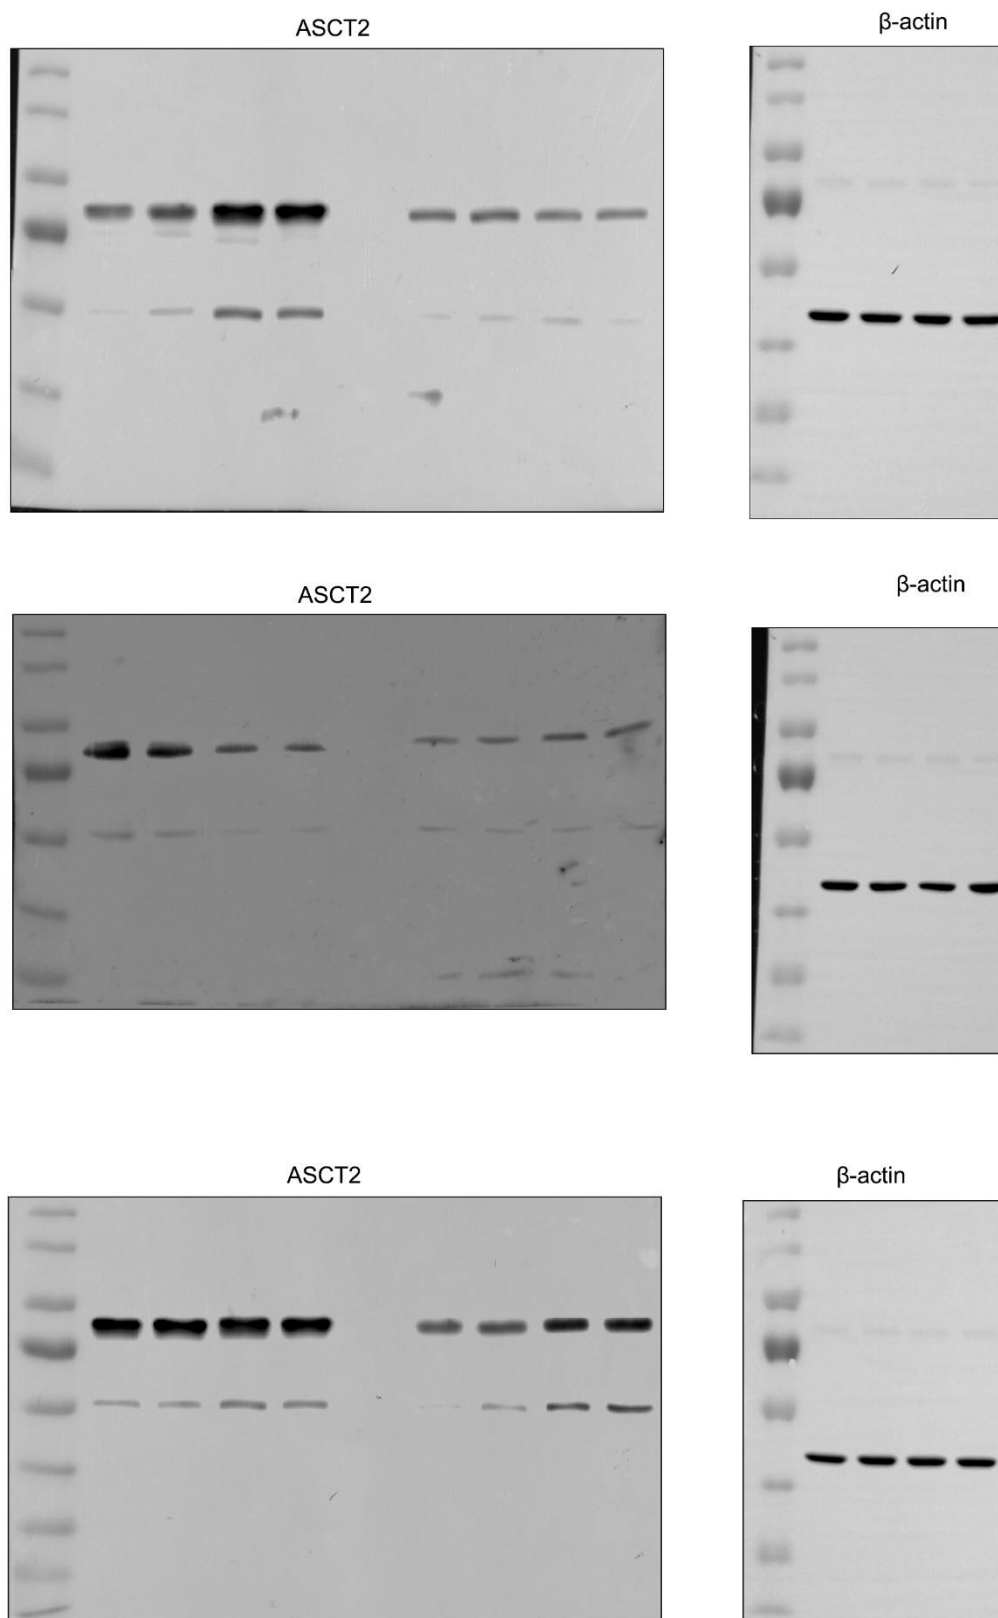

**Supplementary Figure S5.** Full-length gel images of Western blot data in Figure 8.
